# Supplementary material for: Which types of clay minerals fix cesium ions effectively? the “cavity-charge matching effect”
Source: Royal Society of Chemistry journal article supplement (doi:10.1039/c9cp00457b), 2019-01-01
Supplement: c9cp00457b1.pdf [file c9cp00457b1.pdf]

SUPPLEMENTARY INFORMATION

# Which Type of Clay Minerals Fix Cesium Ion Effectively? -Cavity-Charge Matching Effect-

*Takahiro Yamamoto,<sup>1</sup> Tomoaki Takigawa,<sup>2</sup> Takuya Fujimura,<sup>3</sup> Tetsuya Shimada,<sup>2,4</sup>*

*Tamao Ishida,<sup>2,4,5</sup> Haruo Inoue,<sup>2,4</sup> Shinsuke Takagi<sup>2,4\*</sup>*

<sup>1</sup> Japan Atomic Energy Agency, 765-1 Funaishikawa, Tokai-mura, Naka-gun, Ibaraki  
319-1184, Japan.

<sup>2</sup> Department of Applied Chemistry, Graduate School of Urban Environmental  
Sciences, Tokyo Metropolitan University, 1-1 Minami-osawa, Hachioji, Tokyo 192-  
0397, Japan.

<sup>3</sup> Department of Physics and Materials Science, Interdisciplinary Graduate School of  
Science and Engineering, Shimane University, 1060 Nishi-kawatsu-cho, Matsue,  
Shimane 690-8504, Japan.

<sup>4</sup> Research Center for Hydrogen Energy-based Society (ReHES), Tokyo Metropolitan  
University, 1-1 Minami-ohsawa, Hachiohji-shi, Tokyo 192-0397, Japan

<sup>5</sup> Research Center for Gold Chemistry, Tokyo Metropolitan University, 1-1 Minami-  
ohsawa, Hachiohji-shi, Tokyo 192-0397, Japan

### **Ion exchange of clay minerals by NaTPB (Artificial weathering)**

To uniform the weathering degree, an ion exchange from  $K^+$  to  $Na^+$  by NaTPB was carried out for vermiculite, phlogopite G325, phlogopite N and biotite, according to the procedure shown in experimental section. Since  $Na^+$  is the original counter cation for Saponite, the ion exchange is not necessary. The time course of replacement ratio from  $K^+$  to  $Na^+$  is shown in Figure S1. By the artificial weathering treatment for 1000hrs, the replacement ratio reached up to 97.6, 87.7, 90.7, 86.6 % for Vermiculite, Phlogopite G325, Phlogopite N and Biotite, respectively.

□XRD patterns were examined for the  $Na^+$  substituted clay minerals. The patterns for Phlogopite G325 before and after NaTPB treatment as the typical cases are shown in Figure S2. While untreated  $K^+$ - Phlogopite G325 exhibits clear peak at  $8.82^\circ$  (Fig. S2 (i)),  $Na^+$  substituted one shows peak at  $7.28^\circ$  (Fig. S2 (ii)) under the ambient conditions. These observations indicate that interlayer distance (d) was enlarged from 0.07 nm to 0.26 nm by the  $Na^+$  substitution. This expansion can be explained by the hydration

behavior of  $\text{Na}^+$ . In fact, the peak was shifted to  $6.0^\circ$  ( $d = 0.52 \text{ nm}$ ) and  $9.1^\circ$  ( $d = 0.01 \text{ nm}$ ) under the wet and dry condition, respectively. These changes were reversible. On the other hand, XRD pattern for  $\text{K}^+$ - Phlogopite G325 did not show any dependence on the humidity change.

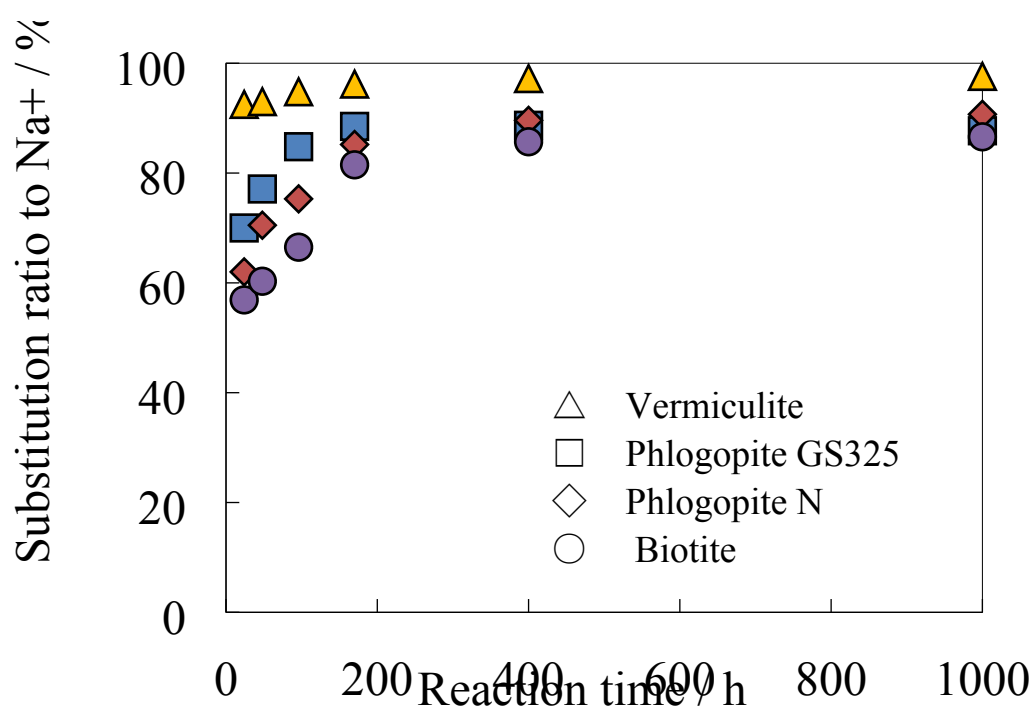

Figure S1. Time-course of substitution ratio from  $\text{K}^+$  to  $\text{Na}^+$  for vermiculite, phlogopite G325, phlogopite N and biotite.

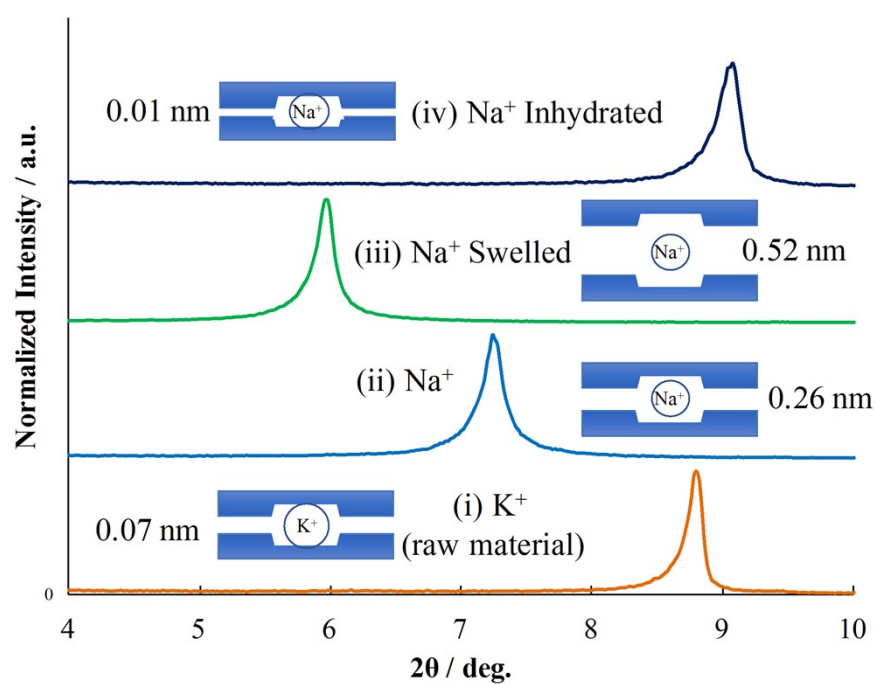

Figure S2. XRD patterns for K<sup>+</sup> (i) and Na<sup>+</sup> (ii) - Phlogopite G325. The patterns for swelled (iii) and unhydrated condition (iv) are shown for Na<sup>+</sup> - Phlogopite G325.

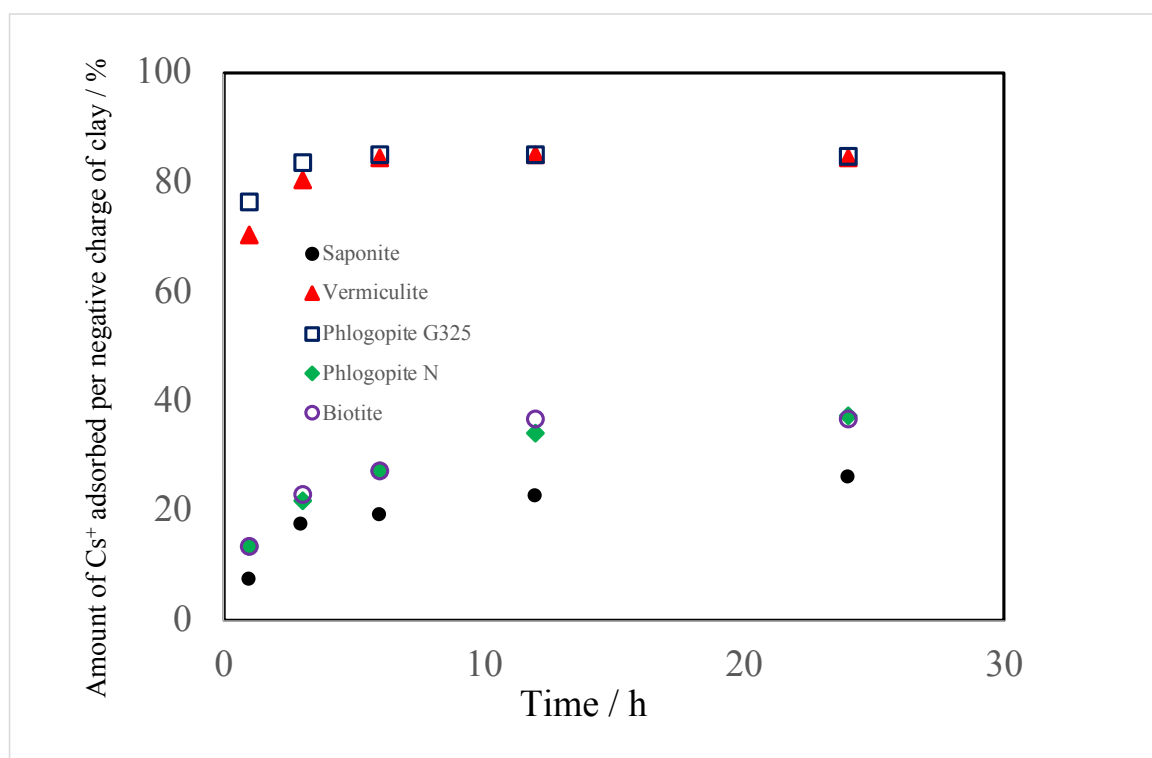

Figure S3. Time-course for Cs<sup>+</sup> adsorption by Na<sup>+</sup> substituted clay minerals.

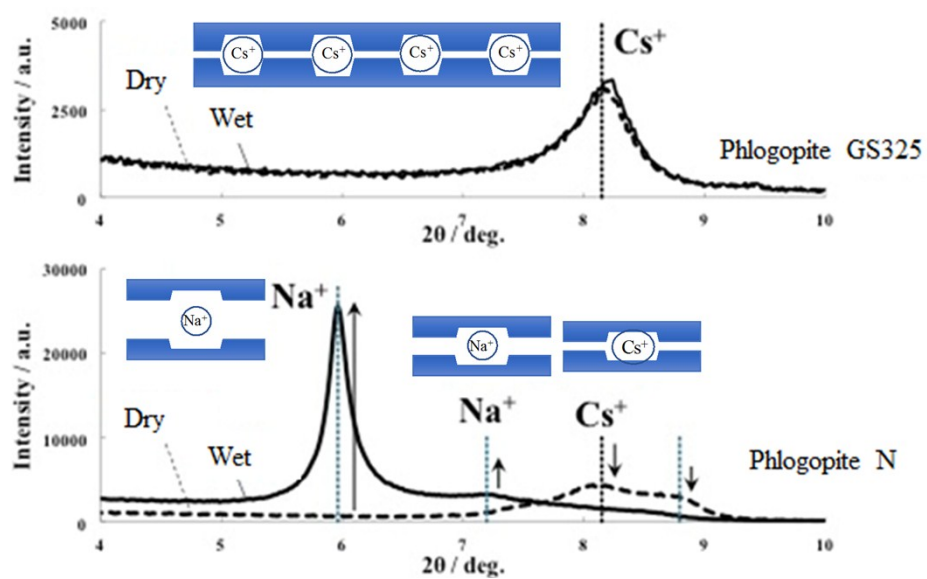

Figure S4. XRD pattern for Phlogopite GS325 (top) and Phlogopite N (bottom) under dry (broken line) and wet (solid line) conditions.

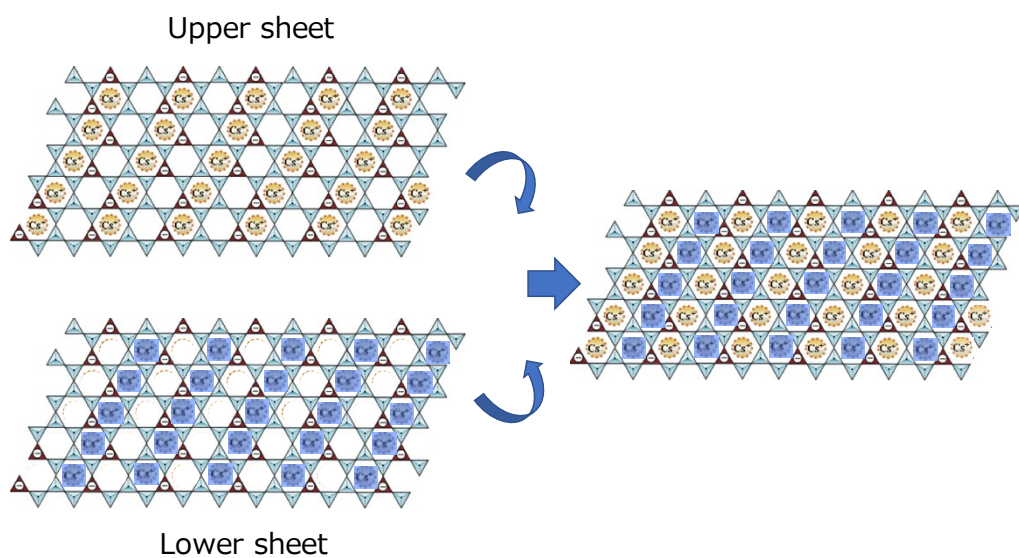

Figure S5. Two clay sheets, where (number of negative charge / number of SDC cavity of the clay) = 0.5, can form interlocking structure.

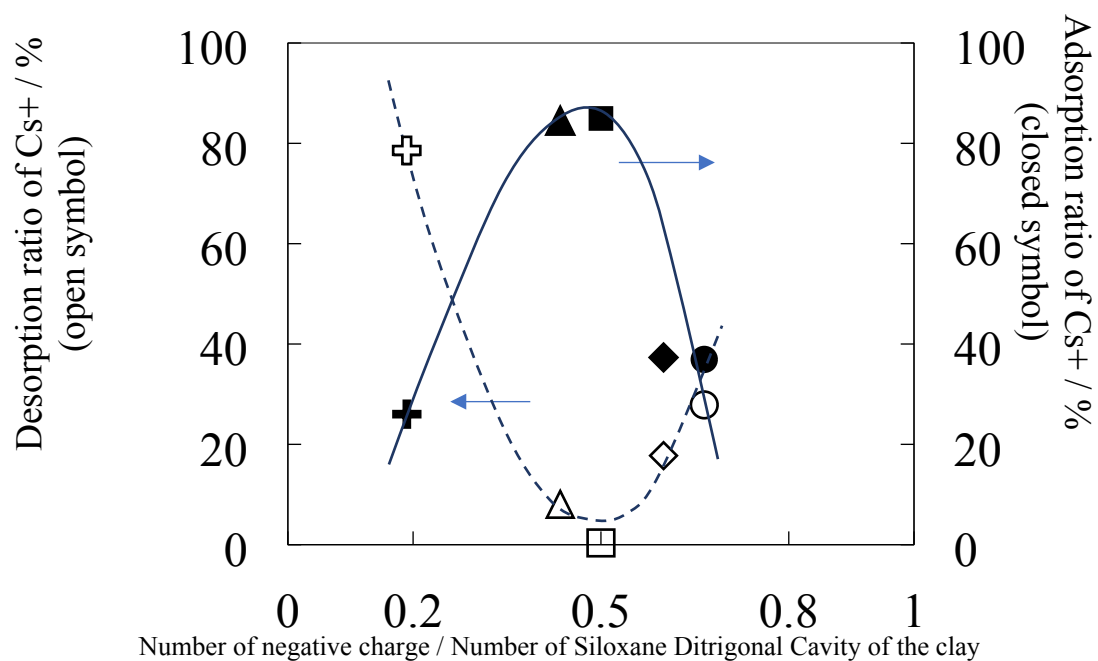

Figure S6. The relationship between (number of negative charge / number of SDC cavity of the clay) and the desorption ratio. Open symbols and dotted line: desorption behavior, closed symbols and bold line: adsorption behavior.

Table S1. Number of negative charge and SDC per unit

| Clay            | Number of negative charge<br>per unit (a) | Number of SDC<br>per unit (b) | (a)/(b) |
|-----------------|-------------------------------------------|-------------------------------|---------|
| Saponite        | 0.4                                       | 2                             | 0.20    |
| Vermiculite     | 0.9                                       | 2                             | 0.45    |
| Phlogopite G325 | 1.0                                       | 2                             | 0.50    |
| Phlogopite N    | 1.2                                       | 2                             | 0.60    |
| Biotite         | 1.3                                       | 2                             | 0.65    |
